# Supplementary material
Source: HighWire-hosted journal article supplement (https://jcptest-stage.highwire.org/highwire/filestream/197940/field_highwire_adjunct_files/1/jcp-2023-208852supp002_data_supplement.pdf)
Supplement: jcp-2023-208852supp002_data_supplement.pdf [file jcp-2023-208852supp002_data_supplement.pdf]

| AMOY GS |          |          |
|---------|----------|----------|
|         | Center#1 | Center#3 |
| ID_1    | 85.10    | 77.70    |
| ID_2    | 97.40    | 98.70    |
| ID_3    | 91.50    | 92.70    |
| ID_4    | 84.30    | 88.30    |
| ID_5    | 10.70    | 17.10    |
| ID_6    | 3.30     | 4.10     |
| ID_7    | 13.30    | 11.80    |
| ID_8    | 5.00     | 7.20     |
| ID_9    | 35.40    | 19.00    |
| ID_10   | 90.40    | NA       |
| ID_11   | 99.20    | NA       |
| ID_12   | 7.80     | 6.50     |
| ID_13   | 99.20    | 99.30    |
| ID_14   | 7.90     | 7.90     |
| ID_15   | 0.80     | 0.70     |
| ID_16   | 87.90    | 89.70    |
| ID_17   | 37.10    | 50.10    |
| ID_18   | 7.00     | NA       |
| ID_19   | 98.80    | 97.20    |
| ID_20   | 19.30    | 19.30    |

**Supplementary Table 3:** Center#1 and Center#3 interlaboratory concordance on 20 HGSOc patients tested by adopting HRD focus panel assay (Amoy Diagnostics Co Ltd) for HRD evaluation. Concordant results (green) were also observed in 16 out of 17 tested samples. In a single instance (yellow) HRD positive score was detected.

Abbreviations: *GS* (Genomic Scar); *ID* (Identify Number); *NA* (Not Assessed).
